# Supplementary material
Source: PubMed Central journal article supplement (PMC4966992)
Supplement: supp_4.2.E338_STROBE_Checklist.pdf [file supp_4.2.E338_STROBE_Checklist.pdf]

## Completed STROBE checklist for reporting cohort studies

### STROBE 2007 (v4) Statement—Checklist of items that should be included in reports of *cohort studies*

| Section/Topic            | Item # | Recommendation                                                                                                                                                                       |
|--------------------------|--------|--------------------------------------------------------------------------------------------------------------------------------------------------------------------------------------|
| Title and abstract       | 1      | (a) Indicate the study's design with a commonly used term in the title or the abstract                                                                                               |
|                          |        | (b) Provide in the abstract an informative and balanced summary of what was done and what was found                                                                                  |
| <b>Introduction</b>      |        |                                                                                                                                                                                      |
| Background/rationale     | 2      | Explain the scientific background and rationale for the investigation being reported                                                                                                 |
| Objectives               | 3      | State specific objectives, including any prespecified hypotheses                                                                                                                     |
| <b>Methods</b>           |        |                                                                                                                                                                                      |
| Study design             | 4      | Present key elements of study design early in the paper                                                                                                                              |
| Setting                  | 5      | Describe the setting, locations, and relevant dates, including periods of recruitment, exposure, follow-up, and data collection                                                      |
| Participants             | 6      | (a) Give the eligibility criteria, and the sources and methods of selection of participants. Describe methods of recruitment                                                         |
|                          |        | (b) For matched studies, give matching criteria and number of exposed and unexposed                                                                                                  |
| Variables                | 7      | Clearly define all outcomes, exposures, predictors, potential confounders, and effect modifiers. Give full names or abbreviations (if applicable) for all variables                  |
| Data sources/measurement | 8*     | For each variable of interest, give sources of data and details of methods of assessment (measurement). Describe comparability of assessment methods if there is more than one group |
| Bias                     | 9      | Describe any efforts to address potential sources of bias                                                                                                                            |
| Study size               | 10     | Explain how the study size was arrived at                                                                                                                                            |
| Quantitative variables   | 11     | Explain how quantitative variables were handled in the analyses. If applicable, describe which group was the reference and why                                                       |
| Statistical methods      | 12     | (a) Describe all statistical methods, including those used to control for confounding                                                                                                |
|                          |        | (b) Describe any methods used to examine subgroups and interactions                                                                                                                  |
|                          |        | (c) Explain how missing data were addressed                                                                                                                                          |
|                          |        | (d) If applicable, explain how loss to follow-up was addressed                                                                                                                       |
|                          |        | (e) Describe any sensitivity analyses                                                                                                                                                |
| <b>Results</b>           |        |                                                                                                                                                                                      |

|                          |     |                                                                                                                                                                                                              |
|--------------------------|-----|--------------------------------------------------------------------------------------------------------------------------------------------------------------------------------------------------------------|
| Participants             | 13* | (a) Report numbers of individuals at each stage of study—eg numbers potentially eligible, examined, eligible, included in the study, completing follow-up, and analysed                                      |
|                          |     | (b) Give reasons for non-participation at each stage                                                                                                                                                         |
|                          |     | (c) Consider use of a flow diagram                                                                                                                                                                           |
| Descriptive data         | 14* | (a) Give characteristics of study participants (eg demographic, clinical, social) and information on exposure and confounders                                                                                |
|                          |     | (b) Indicate number of participants with missing data for each variable of interest                                                                                                                          |
|                          |     | (c) Summarise follow-up time (eg, average and total amount)                                                                                                                                                  |
| Outcome data             | 15* | Report numbers of outcome events or summary measures over time                                                                                                                                               |
| Main results             | 16  | (a) Give unadjusted estimates and, if applicable, confounder-adjusted estimates and their precision (eg, 95% confidence interval). Make clear which confounders were adjusted for and why they were included |
|                          |     | (b) Report category boundaries when continuous variables were categorized                                                                                                                                    |
|                          |     | (c) If relevant, consider translating estimates of relative risk into absolute risk for a meaningful time period                                                                                             |
| Other analyses           | 17  | Report other analyses done—eg analyses of subgroups and interactions, and sensitivity analyses                                                                                                               |
| <b>Discussion</b>        |     |                                                                                                                                                                                                              |
| Key results              | 18  | Summarise key results with reference to study objectives                                                                                                                                                     |
| <b>Limitations</b>       |     |                                                                                                                                                                                                              |
| Interpretation           | 20  | Give a cautious overall interpretation of results considering objectives, limitations, multiplicity of analyses, and other relevant evidence                                                                 |
| Generalisability         | 21  | Discuss the generalisability (external validity) of the study results                                                                                                                                        |
| <b>Other information</b> |     |                                                                                                                                                                                                              |
| Funding                  | 22  | Give the source of funding and the role of the funders for the present study and, if applicable, for the overall research programme from which the present article is based                                  |

\*Give information separately for cases and controls in case-control studies and, if applicable, for exposed and unexposed groups in cohort and cross-sectional studies.
